# Supplementary material for: Methods for the dietary assessment of adult kidney stone formers: a scoping review
Source: Springer Nature journal article supplement (doi:10.1007/s40620-022-01259-3), 2022-02-15
Supplement: 40620_2022_1259_MOESM3_ESM.pdf [file 40620_2022_1259_MOESM3_ESM.pdf]

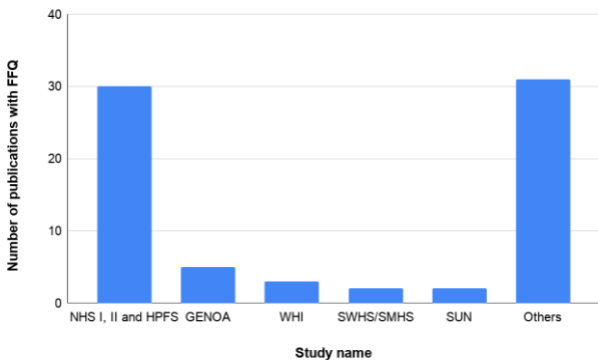

**Fig.7** Number of publications per study with a FFQ (n=73)

NHS I and II: Nurses' Health Study I and II  
 HPFS: Health Professionals Follow-Up Study  
 GENOA: The Genetic Epidemiology Network of Arteriopathy cohort  
 WHI: The Women's Health Initiative Observational Study  
 SWHS/SMHS: Shanghai Women's Health Study and Shanghai Men's Health Study  
 SUN: The Seguimiento Universidad de Navarra
